# Supplementary material
Source: PubMed Central journal article supplement (PMC1914188)
Supplement: plntphys_pp.106.094854_1.pdf [file plntphys_pp.106.094854_1.pdf]

## A STRUCTURAL BASIS FOR CAFFEINE BIOSYNTHESIS

**Andrew A. McCarthy<sup>1</sup> and James G. McCarthy<sup>2</sup>**

<sup>1</sup>*European Molecular Biology Laboratory, 6 rue Jules Horowitz, BP 181, Grenoble 38042, France.*

<sup>2</sup>*Nestlé Research and Development, 101 Avenue Gustave Eiffel, Notre-Dame D'OE, BP 49416, Tours 37097, France.*

### **Supplemental Fig. 1.**

Stereo view of the ligand binding sites showing a  $2F_o - F_c$  omit electron density map contoured at  $2\sigma$  and coloured in blue for the DXMT and XMT. A. Tb bound to DXMT in the 7mX like conformation; B. Tb bound to DXMT; C. XR bound to XMT (molecule A), the O5' hydroxyl was only visible at  $1\sigma$ .
